# Supplementary material for: Assessment of the Quality of Life of Women after Osteoporotic Vertebral Fracture with Consideration of Socio-Demographic Characteristics and Selected Factors Concerning the State of Health
Source: MDPI journal article supplement (doi:10.3390/ijerph191912237), 2022-09-27
Supplement: s1 [file s1]

# Research Questionnaire

## ACCEPTANCE OF ILLNESS AND QUALITY OF LIFE OF WOMEN AFTER OSTEOPOROTIC VERTEBRAL FRACTURE

*Dear Madam,*

*I kindly request your assistance in pursuing this research project by completing the questionnaire. The study is **anonymous** and will be used exclusively for scientific purposes.*

*In each question please mark only one answer, unless otherwise requested. Please provide honest and truthful answers.*

*Please mark with an X your selected answers, or complete the places marked with dots.*

1. Age .....years
2. Body weight..... kg
3. Height ..... cm
4. Marital status
  - a) Never married
  - b) Married/in a partnership relation
  - c) Divorced
  - d) Widowed
5. Place of residence
  - a) Urban
  - b) Rural
6. Education
  - a) Primary/junior high school
  - b) Vocational
  - c) Secondary school
  - d) Post-secondary school
  - e) Higher
7. Material standard

- a) Very good
  - b) Good
  - c) Sufficient
  - d) Poor
  - e) Very poor
- 8. Current occupational status**
- a) Intellectual worker
  - b) Physical worker
  - c) Unemployed
  - d) Retired/ health allowance
  - e) Other (*what?*).....
- 9. How much time has elapsed since the last menstruation?.....**
- 10. Do you suffer from any of the below-mentioned diseases?(you can mark more than one answer)**
- a) Type I diabetes I (requiring subcutaneous injection of insulin)
  - b) Congenital bone fragility
  - c) Hyperthyroidism untreated for a long time
  - d) Hypogonadism (primary ovarian insufficiency), or premature menopause (climacterium) before the age 45
  - e) Chronic malnutrition or malabsorption syndrome
  - f) Chronic liver disease
  - g) Rheumatoid arthritis RA (rheumatism)
  - h) Other chronic diseases (*what?*).....
- 11. Has fracture of the proximal end of the femur (hip) occurred in your father or mother?**
- a) Yes
  - b) No
- 12. Have you had fracture risk assessed using the Fracture Risk Assessment Tool - FRAX calculator?**
- a) Yes, the risk of bone fracture was low
  - b) Yes, the risk of bone fracture was on a mediocre level
  - c) Yes, the risk of bone fracture was high
  - d) Yes, but I do not remember the result of the examination
  - e) No
  - f) I have never heard about such an examination
- 13. Which part of the skeleton did your bone density examination (densitometry) concern? (you may mark more than one answer)**
- a) Proximal end of the femur (hip)
  - b) Lumbar spine
  - c) Radial bone (in the wrist area)
  - d) Calcaneus
- 14. What other examinations have you undergone in order to confirm osteoporosis and/or vertebral fracture? (you may mark more than one answer)**
- a) Radiological examination of the spine RTG
  - b) Computed tomography
  - c) Magnetic resonance
  - d) Morphometric densitometry (vertebral fracture assessment – VFA)

- e) Laboratory tests of blood and urine
- f) Other examinations (*what?*).....
- g) None of the above-mentioned

**15. How long have you been treated for osteoporosis?**

- a) Less than 1 year
- b) From 1 - 5 years
- c) More than 5 - 10 years
- d) More than 10 years

**16. Do you experience pain in the region of the spine and back?**

- a) Yes, all the time
- b) Yes, frequently
- c) Yes, sometimes
- d) Yes, rarely
- e) No, never

NOTE: in the CASE OF CHOOSING ANSWER e) PLEASE GO TO QUESTION 18

**17. Since when have you experienced pain the region of the spine and back?**

- a) Less than 1 year
- b) From 1 - 5 years
- c) More than 5 - 10 years
- d) More than 10 years

**18. Do you associate the fact of osteoporotic vertebral fracture with:**

- a) Falling from a standing position
- b) Minor injury caused by activities of daily living, e.g. getting out of bed, bending down, lifting weights, tripping over obstacle, sudden sneezing, cough, driving without shock-absorption, etc.
- c) I was unaware that I had vertebral fracture, because there was no perceptible injury, and I learned about this fact during a visit to a doctor

**19. Do you have knowledge concerning the number of past osteoporotic vertebral fractures?**

- a) Yes (how many?) .....
- b) No

**20. Apart from vertebral fractures have you sustained other osteoporotic bone fractures? (you may mark more than one answer, please provide the number of past fractures next to the selected answer)**

- a) Yes, fracture of the proximal end of the femur (hip).....
- b) Yes, fractures of the distal end of the radius (wrist).....
- c) Yes, fractures other than the above-mentioned typical of osteoporosis (shoulder bone, collarbone, shoulder blade, femur, shin bone, pelvis, ribs) .....
- d) No

**21. What symptoms have you observed in association with osteoporosis and/or past osteoporotic vertebral fracture? (you can mark more than one answer)**

- a) Acute pain (sometimes girdle pain accompanied by tension of adjacent muscles) in the middle-lower region of the thoracic spine or lumbar-thoracic spine
- b) Chronic back pain at rest and/or while performing activities of daily living
- c) Intensification of pain while sneezing, coughing and defecation
- d) Difficulty with sitting down or standing up
- e) Sensory disturbances and lower limb paresis

- f) Reduction in a normal range of motion in the joints
- g) Problems with mobility
- h) Curvature of the spine, slouching ('widow's hump')
- i) Reduction in height
- j) Decline in circulatory and respiratory efficiency
- k) Intestinal disorders
- l) Deterioration of mood, depression
- m) Other symptoms (*what?*).....
- n) I do not experience any symptoms

**22. What methods of treatment have been applied in association with the fact of your osteoporotic vertebral fracture?(you can mark more than one answer)**

- a) Pharmacological treatment (taking medicines recommended in treatment of osteoporosis)
- b) Lying down and resting in bed
- c) Use of a corset or orthopaedic belt
- d) Isometric exercises
- e) Rehabilitation procedures, e.g. physical therapy, hydrotherapy
- f) Surgical treatment of vertebral fracture (balloon kyphoplasty or vertebroplasty)
- g) Other (*what?*).....

NOTE: in the CASE OF CHOOSING ANSWER h) PLEASE GO TO QUESTION 24

**23. To what extent are you satisfied with the outcomes of the applied treatment?**

- a) Very satisfied
- b) Satisfied
- c) Neither satisfied nor dissatisfied
- d) Dissatisfied
- e) Very dissatisfied

**24. What behaviours concerning life style do you present?**

|    |                                                                                                                                                                                        |     |    |
|----|----------------------------------------------------------------------------------------------------------------------------------------------------------------------------------------|-----|----|
| a) | Do you consume milk and dairy products every day?                                                                                                                                      | Yes | No |
| b) | Do you apply diet rich in fish, vegetables and fruits?                                                                                                                                 | Yes | No |
| c) | Do you try to apply diet with an adequate amount of proteins (meat, <a href="#">eggs</a> , <a href="#">dairy products</a> , <a href="#">nuts</a> , <a href="#">cereals</a> , legumes)? | Yes | No |
| d) | Do you take preparations containing calcium and vitamin D?                                                                                                                             | Yes | No |
| e) | Do you limit the consumption of products rich in phosphorus, such as meat, cold cuts, yellow cheeses?                                                                                  | Yes | No |
| f) | Do you try to reduce the consumption of salt, sugar, and preservatives?                                                                                                                | Yes | No |
| g) | Do you apply a low-calorie diet or intensively lose weight?                                                                                                                            | Yes | No |
| h) | Do you reasonably use solar radiation?                                                                                                                                                 | Yes | No |
| i) | Are you currently smoking cigarettes?                                                                                                                                                  | Yes | No |
| j) | Do you consume 3 or more units of alcohol daily?<br>(1 unit is a shot-glass of vodka, glass of wine, mug of beer)                                                                      | Yes | No |
| k) | Do you regularly drink strong coffee or tea in an amount of more than 2–3 cups daily?                                                                                                  | Yes | No |
| l) | Do you maintain everyday physical activity, e.g. walks, nordic walking (march with poles), dancing, riding a bicycle, aerobic, stretching exercises, yoga, swimming, etc.?             | Yes | No |

|    |                                                                                                                                                                                                        |     |    |
|----|--------------------------------------------------------------------------------------------------------------------------------------------------------------------------------------------------------|-----|----|
| l) | Do you try to prevent falls (removing protruding door thresholds at home, slippery rugs, installation of handrail in the bathroom, good lighting, wearing stable footwear on not slippery sole, etc.)? | Yes | No |
| m) | Do you apply or did you apply hormone replacement therapy HRT and/or herbal remedies alleviating the symptoms of menopause?                                                                            | Yes | No |
| n) | Do you currently take orally glucocorticosteroids or have you taken them for longer than three months at a dose equivalent to 5 mg prednisolone?                                                       | Yes | No |
| o) | Have you been taking for a long time any of the following drugs: blood-thinning medicines, antiepileptic drugs, sedatives, diuretics, thyroid hormones?                                                | Yes | No |
| p) | Do you follow doctor's recommendations and regularly take the prescribed drugs?                                                                                                                        | Yes | No |
| r) | If necessary, do you use advice and follow the recommendations of a medical specialist, e.g. cardiologist, neurologist, and ophthalmologist?                                                           | Yes | No |

**25. To what extent osteoporosis and/or vertebral fracture exerted an effect on the deterioration of your quality of life?**

- a) To a very great extent
- b) To a great extent
- c) Neither to a great nor small extent
- d) To a small extent
- e) Had no effect

*Thank you very much for completing the questionnaire and the time devoted. Please continue to the next questionnaires.*

*Yours faithfully,*
